# Supplementary material
Source: Royal Society of Chemistry journal article supplement (doi:10.1039/d6cc02408d)
Supplement: d6cc02408d1.pdf [file d6cc02408d1.pdf]

## *Supporting Information*

### **Post-Treatment Additives Enable Synergistic Surface Passivation and Secondary Grain Growth Regulation toward High-Performance Air-Processed Perovskite Solar Cells**

Kelan Wang<sup>a,1</sup>; Shuai Xu<sup>a,1</sup>; Rong Cao<sup>b</sup>, Xinyi Zhang<sup>a</sup>; Haocong Wang<sup>a</sup>; Chongzhen Tang<sup>a</sup>; Ran Fansheng<sup>b,\*</sup>; Yipu Wang<sup>a,\*</sup>; Minmin Wang<sup>a,\*</sup>; Yanqiang Hu<sup>a,\*</sup>

<sup>a</sup>School of Chemistry and Chemical Engineering, Nantong University, Nantong 226001, Jiangsu, China.

<sup>b</sup>School of Pharmacy and Jiangsu Province Key Laboratory for Inflammation and Molecular Drug Target, Nantong University, Nantong 226001, China.

#### **Corresponding Author**

\*E-mail:                    ranfansheng1992@163.com;                    wangyipu@ntu.edu.cn;  
mmwang0528@ntu.edu.cn; HUYQNTU@ntu.edu.cn

#### **Experimental Section:**

*Chemicals and reagents:* Methylammonium bromide (MABr, 99.5%), formamidinium iodide (FAI, 99.99%), cesium iodide (CsI, 99.999%), lead bromide (PbBr<sub>2</sub>, 99.99%), lead iodide (PbI<sub>2</sub>, 99.99%) were purchased from Advanced Election Technology Co., Dimethyl sulfoxide (DMSO), N, N-dimethylformamide (DMF) and isopropanol (IPA), N-(2-fluoropyridin-6-yl)-2-(4-amino-4-formamido-1H-pyrazol-2-yl)acetamide (FPA) were purchased from Sigma-Aldrich. Commercial tin (IV) oxide solution (SnO<sub>2</sub>, 15% in H<sub>2</sub>O colloidal dispersion) was purchased from Alfa Aesar. All salts and solvents were used as received without any further purification.

*Perovskite solar cell fabrication:* FTO substrate was sequentially ultrasonically cleaned by deionized water, acetone, ethanol, and isopropanol for 30 min, and then treated with UV/O<sub>3</sub> light for 60 min. The SnO<sub>2</sub> film was fabricated on the FTO substrate

from a SnO<sub>2</sub> nanocrystal solution (diluted with H<sub>2</sub>O to 2.5%) at 3,000 rpm for 30 s and subsequently thermal annealing at 150 °C for 30 min in an ambient environment. KCl solution with a concentration of 5 mg/ml was spin-coated on the substrates for 20 s at 4000 rpm. The substrates were annealed at 100 °C for 10 min. The substrate was treated with UV-ozone for 30 min before spin-coating of the perovskite solution. Then, a 0.221 g FAI, 0.648 g PbI<sub>2</sub>, and 0.03 g MACl were dissolved in DMF/DMSO (8:1, v/v) and stirred at 70 °C for 2 h, and then spin-coated on the substrate at 3000 rpm for 30 s. During the spin-coating, 200 μL of ethyl acetate was dripped after spinning for 10 s. Subsequently, the perovskite film was annealed at 150 °C for 15 min in an ambient environment. Afterward, 40 μL of isopropanol solution with different FPA concentrations was deposited on the perovskite film by spin-coating at 4,000 rpm for 30 s, and then at 150 °C for 5 min. Finally, a 100 nm thick Au electrode was deposited on top of the device by thermal evaporation under vacuum conditions. The active area is 0.09 cm<sup>2</sup>, as defined by the mask.

*Measurement and Characterization:* Powder X-ray diffraction (XRD) patterns of the perovskite films were recorded by a Bruker D8 diffractometer with Cu K $\alpha$  radiation ( $\lambda=1.5406$  Å). FTIR spectra were measured using a Bruker Vertex 80v Fourier transform infrared spectrometer. The surface morphology of the perovskite films was observed by field-emission scanning electron microscopy (FE-SEM; Quanta 250FEG) and atomic force microscope (AFM; Brook Multimode 8). Absorption spectra of the prepared films were measured with a UV-vis-NIR spectrophotometer (UV-3600, Shimadzu). Ultraviolet photoelectron spectroscopy (UPS) was performed using a PHI5000VERSA PROBE II instrument. The PL spectra of the films were obtained at room temperature by using a steady-state lifetime spectrofluorometer (Varian Cary Eclipse). The time-resolved photoluminescence decay of the perovskite film was measured using a Horiba Fluorolog-3 Time Correlated Single Photon Counting (TCSPC) system. The current-voltage characteristic curves of the fabricated PSCs were measured under standard AM 1.5 sunlight (100 mW cm<sup>-2</sup>, WXS-90L2, Wacom).

This file includes **Figure S1-S13**:

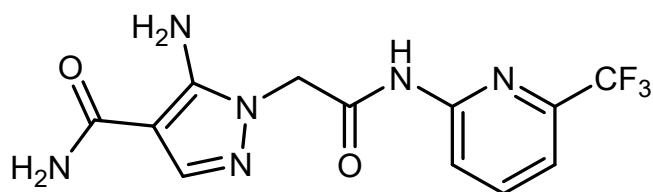

**Figure S1.** The molecular structure of FPA.

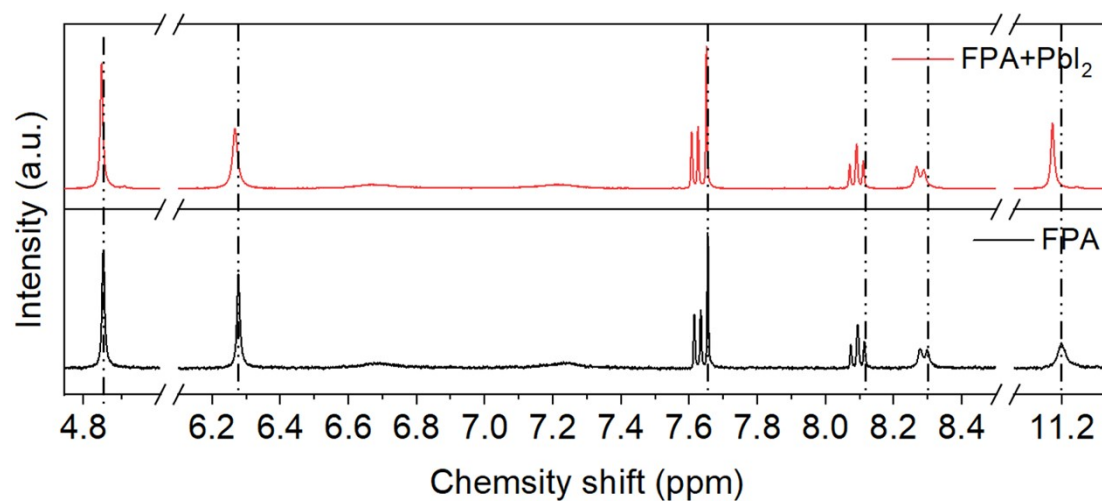

**Figure S2.**  $^1\text{H}$  NMR spectra of FPA and FPA+ $\text{PbI}_2$  mixture.

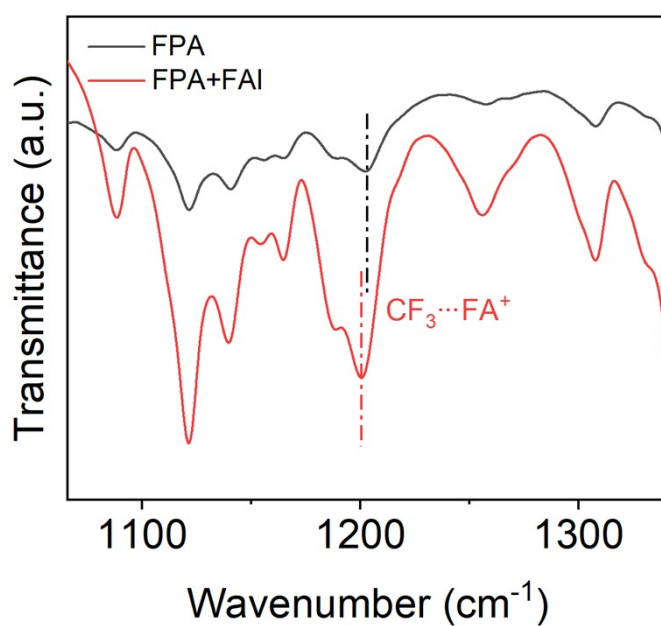

**Figure S3.** FTIR spectra of FPA and FPA+FAI mixture.

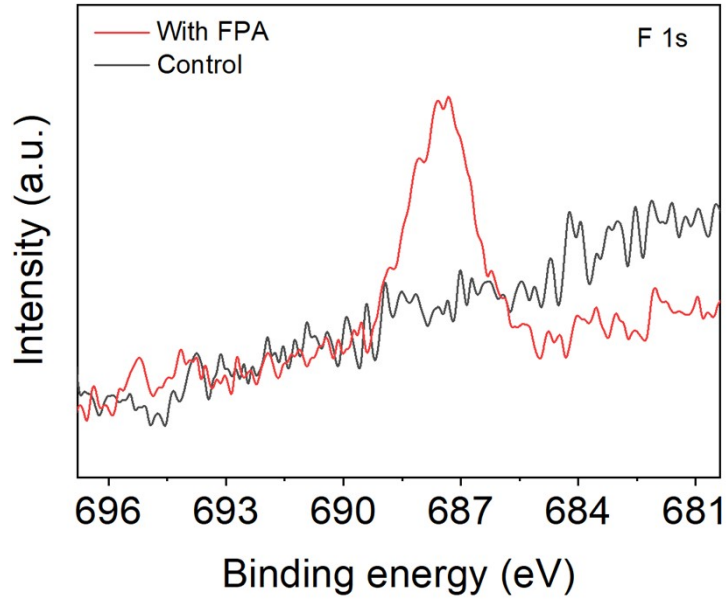

**Figure S4.** XPS spectra of F 1s with and without FPA.

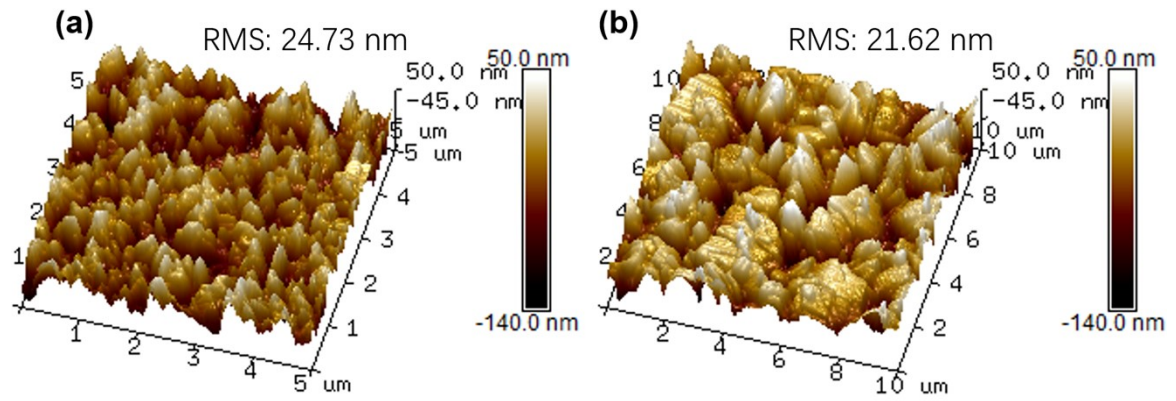

**Figure S5.** 3D AFM image of the perovskite film without and with FPA.

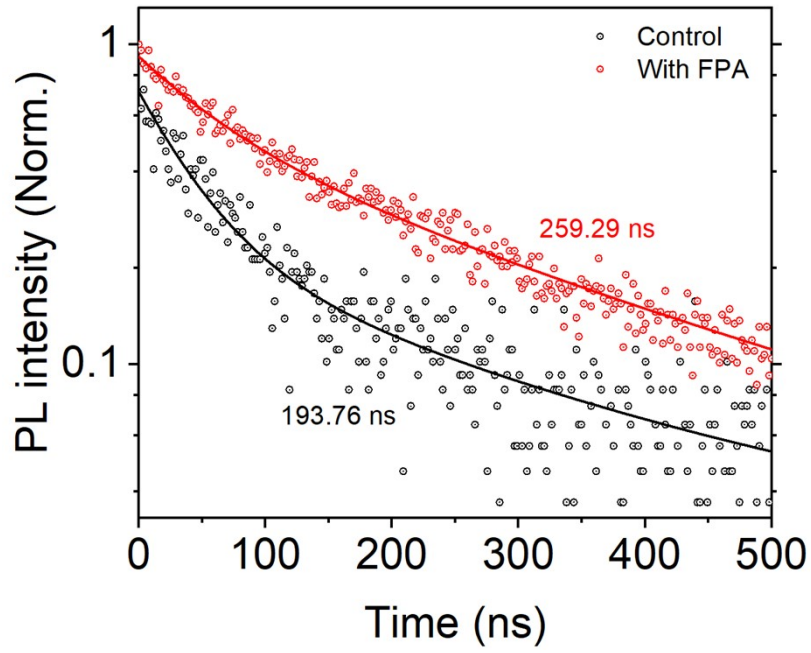

**Figure S6.** TRPL spectra of the perovskite film without and with FPA.

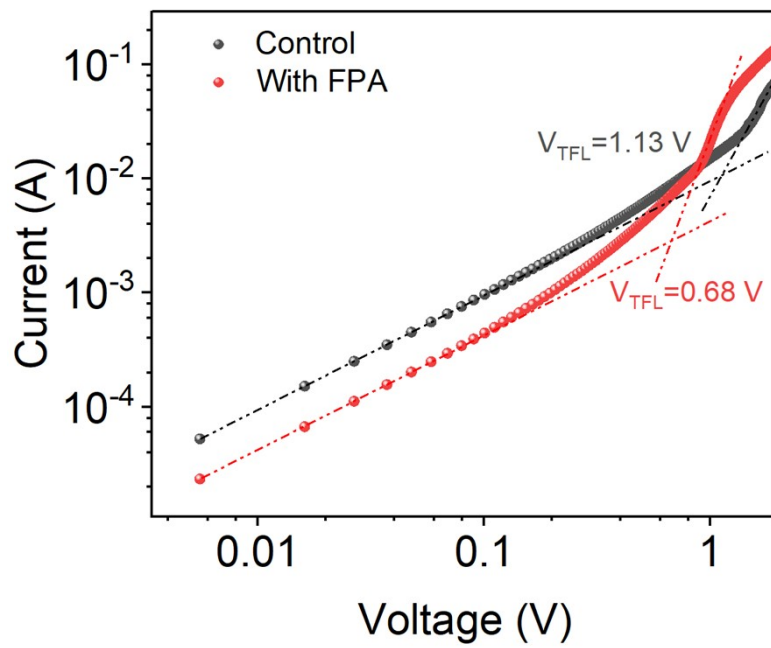

**Figure S7.** SCLC characterization of electron-only devices based on the perovskite film without and with FPA.

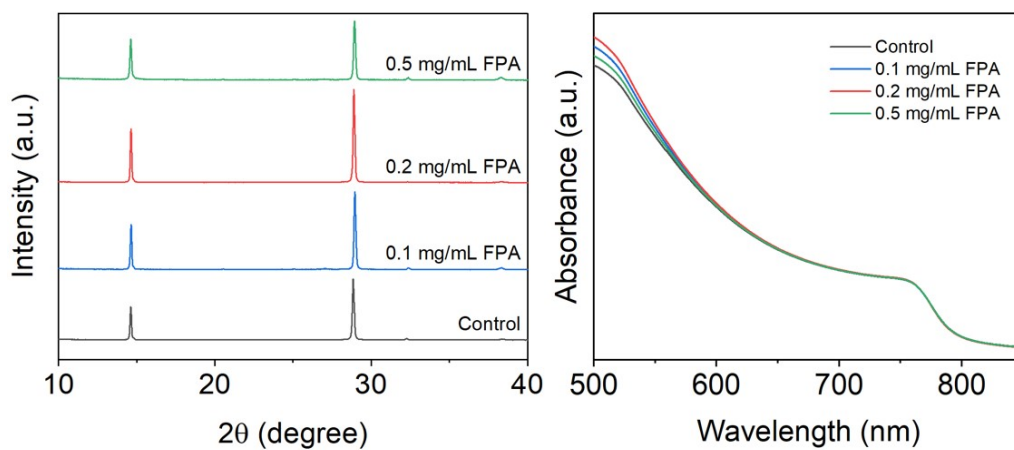

**Figure S8.** XRD and UV-vis absorption spectra of perovskite films treated with different concentrations of FPA.

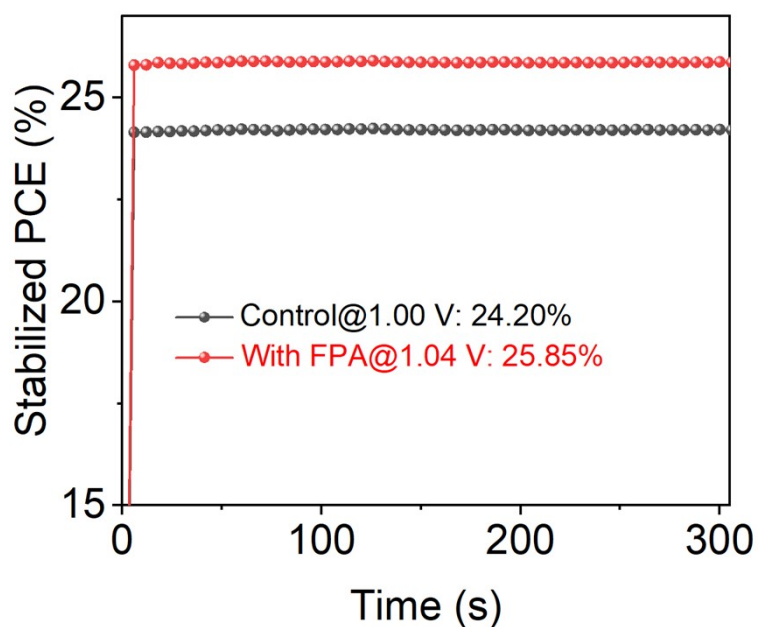

**Figure S9.** The continuous output for the control and FPA-modified PSCs.

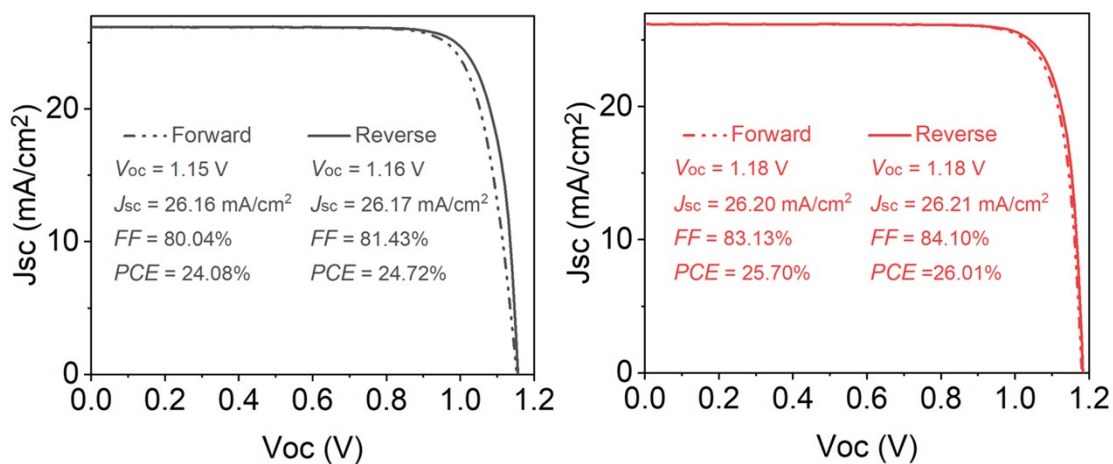

**Figure S10.** Forward and reverse scan for the control and FPA-modified PSCs. The hysteresis is calculated as follows:  $HI = (PCE_{Reverse} - PCE_{Forward}) / PCE_{Reverse}$ .

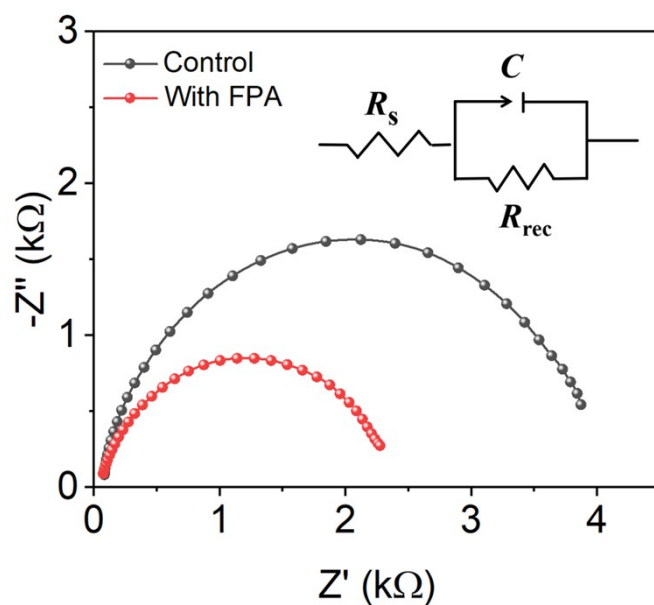

**Figure S11.** The EIS plot for the control and FPA-modified PSCs.

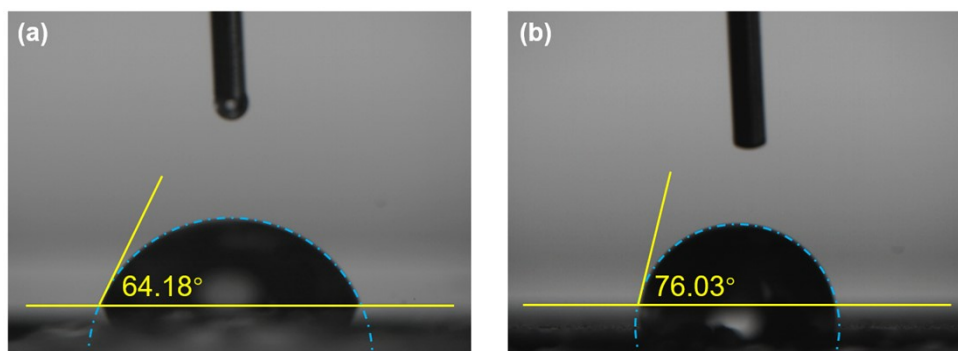

**Figure S12.** The water contact angle test of the perovskite film without and with FPA.

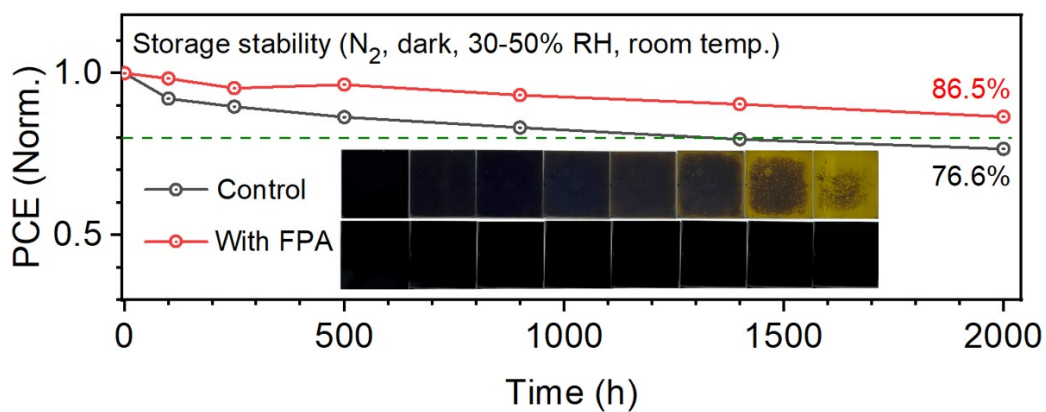

**Figure S13.** Storage stability for the unencapsulated control and FPA-modified PSCs.

**Table S1.** The photovoltaic performance parameters for devices with different FPA post-treatment concentrations.

| Concentration | $V_{oc}$ (V) | $J_{sc}$ ( $mA/cm^2$ ) | FF (%) | PCE (%) |
|---------------|--------------|------------------------|--------|---------|
| 0 mg/mL       | 1.16         | 26.17                  | 81.43  | 24.72   |
| 0.1 mg/mL     | 1.17         | 26.20                  | 83.02  | 25.45   |
| 0.2 mg/mL     | 1.18         | 26.21                  | 84.10  | 26.01   |
| 0.5 mg/mL     | 1.16         | 26.18                  | 82.64  | 25.10   |

**Table S2.** Summary of recently reported air-prepared efficient PSCs with a formal structure (n-i-p).

| Year | RH (%) | Perovskites                                          | Methods  | Types | PCE (%) | Area (cm <sup>2</sup> ) | Ref.             |
|------|--------|------------------------------------------------------|----------|-------|---------|-------------------------|------------------|
| 2021 | 50~60  | MAPbI <sub>3</sub>                                   | One-step | n-i-p | 20.55   | 0.09                    | [1]              |
| 2021 | ~40    | FA <sub>x</sub> MA <sub>1-x</sub> PbI <sub>3</sub>   | Two-step | n-i-p | 22.09   | 0.10                    | [2]              |
| 2021 | 20~90  | FAPbI <sub>3</sub>                                   | Two-step | n-i-p | 24.10   | 0.05                    | [3]              |
| 2022 | 50~70  | FA <sub>x</sub> MA <sub>1-x</sub> PbI <sub>3</sub>   | One-step | n-i-p | 23.70   | 0.0628                  | [4]              |
| 2022 | 40~55  | FAPbI <sub>3</sub>                                   | Two-step | n-i-p | 23.46   | /                       | [5]              |
| 2022 | 20~80  | FAPbI <sub>3</sub>                                   | One-step | n-i-p | 23.91   | 0.05                    | [6]              |
| 2022 | ~50    | FA <sub>x</sub> MA <sub>1-x</sub> PbI <sub>3</sub>   | One-step | n-i-p | 24.07   | /                       | [7]              |
| 2023 | ~40    | FA <sub>x</sub> MA <sub>1-x</sub> PbI <sub>3</sub>   | Two-step | n-i-p | 22.40   | 0.09                    | [8]              |
| 2023 | 30±5   | FA <sub>x</sub> MA <sub>1-x</sub> PbI <sub>3</sub>   | Two-step | n-i-p | 23.30   | /                       | [9]              |
| 2023 | 50~60  | FA <sub>x</sub> MA <sub>1-x</sub> PbI <sub>3</sub>   | Two-step | n-i-p | 24.42   | 0.08                    | [10]             |
| 2023 | 30~40  | FAPbI <sub>3</sub>                                   | One-step | n-i-p | 24.00   | 0.09                    | [11]             |
| 2023 | 10~50  | FA <sub>x</sub> MA <sub>1-x</sub> PbI <sub>3</sub>   | Two-step | n-i-p | 24.14   | 0.09                    | [12]             |
| 2023 | 30~85  | FA <sub>x</sub> MA <sub>1-x</sub> PbI <sub>3</sub>   | Two-step | n-i-p | 25.08   | 0.08                    | [13]             |
| 2024 | 20~30  | FA <sub>x</sub> MA <sub>1-x</sub> PbI <sub>3</sub>   | Two-step | n-i-p | 24.16   | 0.09                    | [14]             |
| 2024 | 10~15  | FA <sub>x</sub> MA <sub>1-x</sub> PbI <sub>3</sub>   | One-step | n-i-p | 24.47   | 0.10                    | [15]             |
| 2024 | /      | FA <sub>x</sub> MA <sub>1-x</sub> PbI <sub>3</sub>   | One-step | n-i-p | 24.63   | /                       | [16]             |
| 2024 | 20~60  | FAPbI <sub>3</sub>                                   | Two-step | n-i-p | 24.70   | 0.09                    | [17]             |
| 2024 | 20~50  | FAPbI <sub>3</sub>                                   | Two-step | n-i-p | 25.08   | 0.04                    | [18]             |
| 2024 | 30~60  | FA <sub>x</sub> MA <sub>1-x</sub> PbI <sub>3</sub>   | One-step | n-i-p | 25.71   | 0.06                    | [19]             |
| 2025 | 15~25  | FA <sub>x</sub> MA <sub>1-x</sub> PbI <sub>3</sub>   | Two-step | n-i-p | 25.18   | 0.09                    | [20]             |
| 2025 | 20~40  | FA <sub>x</sub> MA <sub>1-x</sub> PbI <sub>3</sub>   | Two-step | n-i-p | 25.03   | 0.10                    | [21]             |
| 2025 | 10~15  | FA <sub>x</sub> MA <sub>1-x</sub> PbI <sub>3</sub>   | One-step | n-i-p | 25.30   | 0.10                    | [22]             |
| 2025 | 50-60  | FA <sub>x</sub> MA <sub>1-x</sub> PbI <sub>3</sub>   | Two-step | n-i-p | 26.50   | 0.08                    | [23]             |
| 2025 | ~50    | FA <sub>0.9</sub> Cs <sub>0.1</sub> PbI <sub>3</sub> | One-step | n-i-p | 26.03   | 0.09                    | [24]             |
| 2025 | ~50    | FA <sub>0.9</sub> Cs <sub>0.1</sub> PbI <sub>3</sub> | One-step | n-i-p | 26.18   | 0.09                    | [25]             |
| 2026 | 30~40  | FAPbI <sub>3</sub>                                   | Two-step | n-i-p | 26.52   | 0.05                    | [26]             |
| 2026 | 25~40  | FA <sub>0.9</sub> MA <sub>0.1</sub> PbI <sub>3</sub> | One-step | n-i-p | 26.01   | 0.09                    | <b>This work</b> |

**References**

- [1] X. Cui, J. Li, M. Shang, X. Zhao, S. Liu, Q. Tai, *Adv. Energy Mater.* **2021**, *11*, 2102169.  
[2] F. Qiu, M. Li, S. Wang, J. Sun, Y. Jiang, J. Qi, J. Hu, *J. Mater. Chem. A* **2021**, *9*, 24064.

- [3] W. Hui, L. Chao, H. Lu, F. Xia, Q. Wei, Z. Su, T. Niu, L. Tao, B. Du, D. Li, Y. Wang, H. Dong, S. Zuo, B. Li, W. Shi, X. Ran, P. Li, H. Zhang, Z. Wu, C. Ran, L. Song, G. Xing, X. Gao, J. Zhang, Y. Xia, Y. Chen, W. Huang, *Science* **2021**, *371*, 1359.
- [4] M. Wang, H. Sun, L. Meng, M. Wang, L. Li, *Adv. Mater.* **2022**, *34*, 2200041.
- [5] J. Wang, L. Yuan, H. Luo, C. Duan, B. Zhou, Q. Wen, K. Yan, *Chem. Eng. J.* **2022**, *446*, 136968.
- [6] L. Chao, Y. Xia, X. Duan, Y. Wang, C. Ran, T. Niu, L. Gu, D. Li, J. Hu, X. Gao, J. Zhang, Y. Chen, *Joule* **2022**, *6*, 2203.
- [7] W. Fan, K. Deng, Y. Shen, Y. Bai, L. Li, *Angew. Chem. Int. Ed.* **2022**, *61*, e202211259.
- [8] W. Zhang, L. He, Y. Zhou, D. Tang, B. Ding, C. Zhou, P. Dyson, M. Nazeeruddin, X. Li, *Chem. Eng. J.* **2023**, *457*, 141216.
- [9] Q. Zeng, Q. Ma, L. Li, B. Zheng, Y. Pan, X. Zhao, H. Xiao, C. Yan, F. Liu, *Chem. Commun.* **2023**, *59*, 5269.
- [10] L. Yuan, J. Wang, P. Huang, Q. Yin, S. Zou, L. Wang, Z. Zhang, H. Luo, F. Liu, J. Qiu, J. Xie, L. Ding, K. Yan, *Small Methods* **2023**, *7*, 2201467.
- [11] Y. Du, Q. Tian, S. Wang, L. Yin, C. Ma, Z. Wang, L. Lang, Y. Yang, K. Zhao, S. Liu, *Adv. Mater.* **2023**, *36*, 2307583.
- [12] Y. Zhang, L. Ren, P. Zhai, J. Xin, J. Wu, Q. Zhang, X. Chen, K. Zhao, L. Zhang, S. Liu, *Energy Environ. Sci.* **2024**, *17*, 296.
- [13] L. Yan, H. Huang, P. Cui, S. Du, Z. Lan, Y. Yang, S. Qu, X. Wang, Q. Zhang, B. Liu, X. Yue, X. Zhao, Y. Li, H. Li, J. Ji, M. Li, *Nat. Energy* **2023**, *8*, 1158.
- [14] C. Tian, T. Wu, Y. Zhao, X. Zhou, B. Li, X. Han, K. Li, C. Hou, Y. Li, H. Wang, Q. Zhang, *Adv. Energy Mater.* **2024**, *14*, 2303666.
- [15] B. Liu, X. Ren, R. Li, Y. Chen, D. He, Y. Li, Q. Zhou, D. Ma, X. Han, X. Shai, K. Yang, S. Lu, Z. Zhang, J. Feng, C. Chen, J. Yi, J. Chen, *Adv. Mater.* **2024**, *36*, 2312679.
- [16] B. Liu, Q. Zhou, Y. Li, Y. Chen, D. He, D. Ma, X. Han, Ru Li, K. Yang, Y. Yang, S. Lu, X. Ren, Z. Zhang, L. Ding, J. Feng, J. Yi, J. Chen, *Angew. Chem. Int. Ed.* **2024**, *63*, e202317185.
- [17] Y. Zou, W. Yu, H. Guo, Q. Li, X. Li, L. Li, Y. Liu, H. Wang, Z. Tang, S. Yang, Y. Chen, B. Qu, Y. Gao, Z. Chen, S. Wang, D. Zhang, Y. Chen, Q. Chen, S. Zakeeruddin, Y. Peng, H. Zhou, Q. Gong, M. Wei, M. Grätzel, L. Xiao, *Science* **2024**, *385*, 161.
- [18] X. Shi, T. Liu, Y. Dou, X. Hu, Y. Liu, F. Wang, L. Wang, Z. Ren, S. Chen, *Adv. Mater.* **2024**, *36*, 2402785.
- [19] Y. Li, Y. Duan, J. Feng, Y. Sun, K. Wang, H. Li, H. Wang, Z. Zang, H. Zhou, D. Xu, M. Wu, *Angew. Chem. Int. Ed.* **2024**, *63*, e202410378.
- [20] C. Tian, T. Wu, X. Zhou, Y. Zhao, B. Li, X. Han, K. Li, C. Hou, Y. Li, H. Wang, Q. Zhang, *Adv. Mater.* **2025**, *37*, 2411982.
- [21] R. Nie, P. Zhang, J. Gao, C. Wang, W. Chu, L. Li, K. Wang, D. Qian, F. Lin, Y. Wu, X. Zhao, W. Guo, Z. Zhang, *Nat. Commun.* **2025**, *16*, 6438.
- [22] H. Yang, Z. Guo, Z. Xu, W. Cai, S.M. Qaid, Z. Zang, *Adv. Mater.* **2025**, e10967.
- [23] L. Yan, H. Huang, P. Cui, Y. Yang, Z. Su, Y. Lu, M. Li, *ACS Energy Lett.* **2025**, *10*, 5156-5164.
- [24] Y. Li, Z. Xie, Y. Duan, Y. Li, Y. Sun, C. Su, Z. Liu, Q. Peng, K. Guo, S. Liu, Z. Liu, *Adv. Mater.* **2025**, *37*, 2414354.
- [25] Y. Li, Z. Zhang, Y. Cai, S. Pu, M. Cheng, Y. Duan, *Adv. Mater.* **2025**, e14903.
- [26] B. Li, C. Tian, X. Zhou, Y. Zhao, X. Han, C. Hou, K. Li, Y. Li, H. Wang, Y. Rui, Q. Zhang, *Adv. Mater.* **2026**, e23630.
